# Supplementary material
Source: PubMed Central journal article supplement (PMC2292779)
Supplement: cmaj_178_9_1153_v2_1.pdf [file cmaj_178_9_1153_v2_1.pdf]

## Appendix 1: Search strategy

The following databases were searched in OVID on Feb. 2, 2008: MEDLINE (1950 to week 4, January 2008), EMBASE (1980 to week 5, 2008), Evidence-Based Medicine Reviews (fourth quarter 2007), Cochrane Central Register of Controlled Trials (fourth quarter 2007).

### MEDLINE

1. (pron\$ adj4 position\$).mp.
2. clinical trial.mp. or clinical trial.pt. or random:.mp. or tu.xs.
3. 1 and 2

### EMBASE

4. (pron\$ adj4 position\$).mp.
5. random:.tw. or clinical trial:.mp. or exp health care quality/
6. 1 and 2

### Cochrane Central Register of Controlled Trials

7. (pron\$ adj4 position\$).mp.

Notes: '\$' retrieves unlimited suffix variations; the .mp. extension includes the title, original title and abstract fields in all databases, in addition to the subject heading of prone position in MEDLINE. Filters for MEDLINE and EMBASE (lines 2 and 5) are based on published sensitive strategies for retrieving randomized trials.<sup>1,2</sup> References from these 3 databases were combined and duplicates removed using OVID software.

We also separately searched ISI Science Citation Index Expanded (1945 to present) using the following strategy:

1. TS=prone
2. TS=prone position\*
3. TS=prone ventilation
4. 1 or 2 or 3
5. TS=acute respiratory distress syndrome
6. TS=adult respiratory distress syndrome
7. TS=acute lung injury
8. TS=hypox\*
9. TS=acute respiratory failure
10. 5 or 6 or 7 or 8 or 9
11. 4 and 10
12. TS=randomized controlled trial
13. TS=controlled clinical trial
14. TS=clinical trial
15. 12 or 13 or 14
16. 11 and 15

Notes: '\*' retrieves unlimited suffix variations; TS denotes topic.

## References

1. Haynes RB, McKibbin KA, Wilczynski NL, et al; Hedges Team. Optimal search strategies for retrieving scientifically strong studies of treatment from Medline: analytical survey. *BMJ* 2005;330:1179.
2. Wong SS, Wilczynski NL, Haynes RB. Developing optimal search strategies for detecting clinically sound treatment studies in EMBASE. *J Med Libr Assoc* 2006;94:41-7.

## References of excluded studies

### *Ongoing randomized controlled trial (n=1)*

1. Gattinoni L, Taccone P. Prone-Supine Study II: the effect of prone positioning for patients affected by acute respiratory distress syndrome. ClinicalTrials.gov identifier NCT00159939. Available: [www.clinicaltrials.gov/ct2/show/NCT00159939](http://www.clinicaltrials.gov/ct2/show/NCT00159939) (accessed Apr. 14, 2008).

### *Randomized controlled trial with outcomes data not provided after author contact (n=1)*

2. Lee DL, Cheng S, Huang TYC. Prone Position Attenuates Inflammatory Response in Patients with Localized Acute Respiratory Distress Syndrome During Recruitment Maneuver [abstract]. *Intensive Care Med.* 2007;33:S146.

### *Randomized controlled trial with outcomes data not available after author contact (n=1)*

3. Stotzer A, Bein Th, Krenz D, et al. The combination of prone position and open lung maneuver in acute lung injury (ALI) [abstract]. *Intensive Care Med.* 1999;25:S74.

### *Randomized controlled trial enrolling neonates (n=2)*

4. Kumar P, Steele AM. Effect of prone positioning on oxygenation and pulmonary mechanics in preterm infants with acute respiratory distress syndrome [abstract]. *Am J Respir Crit Care Med.* 2003;167:A509.
5. Antunes LC, Rugolo LM, Crocchi AJ. Effect of preterm infant position on weaning from mechanical ventilation [Portuguese]. *J Pediatr (Rio J).* 2003;79:239-244.

Appendix 1 to Sud S, Sud M, Friedrich JO, et al. Prone ventilation improves oxygenation but not mortality in acute hypoxemic respiratory failure: systematic review and meta-analysis. *CMAJ* 2008; 178(9): 1153-1161.

*Randomized controlled trial where all patients received ventilation in the prone position (n=4)*

6. Rialp G, Betbese AJ, Perez-Marquez M, et al. Short-term effects of inhaled nitric oxide and prone position in pulmonary and extrapulmonary acute respiratory distress syndrome. *Am J Respir Crit Care Med.* 2001;164:243-249.
7. Varpula T, Jousela I, Niemi R, et al. Combined effects of prone positioning and airway pressure release ventilation on gas exchange in patients with acute lung injury. *Acta Anaesthesiol Scand.* 2003;47:516-524.
8. Michelet P, Roch A, Gainnier M, et al. Influence of support on intra-abdominal pressure, hepatic kinetics of indocyanine green and extravascular lung water during prone positioning in patients with ARDS: a randomized crossover study [erratum appears in *Crit Care* 2005 Aug;9(4):308]. *Crit Care.* 2005;9:R251-R257.
9. Prebio M, Katz-Papatheophilou E, Heindl W, et al. Reduction of pressure sores during prone positioning of ventilated intensive care patients by the prone-head support system: a pilot study [German]. *Wien Klin Wochenschr.* 2005;117:98-105.

*Randomized controlled trial with non-supine control group (n=3)*

10. Staudinger T, Kofler J, Mullner M et al. Comparison of prone positioning and continuous rotation of patients with adult respiratory distress syndrome: results of a pilot study. *Crit Care Med.* 2001;29:51-56.
11. Sebat F, Henry K, Musthafa AA, et al. The utility of an automated proning and kinetic therapy bed and its effect on lung recruitment, ventilator days and mortality in patients with acute lung injury (ALI) [abstract]. *Chest.* 2004;126:719S-720S.
12. Bein T, Sabel K, Scherer A et al. Comparison of incomplete (135°) and complete prone position (180°) in patients with acute respiratory distress syndrome. Results of a prospective, randomised trial [German]. *Anaesthesist.* 2004;53:1054-1060.

*Crossover randomized design (patients received both prone and supine ventilation; n=11)*

13. Vollman KM, Bander JJ. Improved oxygenation utilizing a prone positioner in patients with acute respiratory distress syndrome. *Intensive Care Med.* 1996;22:1105-1111.
14. Hering R, Spiegel TV, Vorwerk R, et al. Effects of prone positioning on hemodynamics, renal and hepatic function in patients with acute respiratory distress syndrome (ARDS) [abstract]. *Am J Respir Crit Care Med.* 1998;157:A464.
15. Hentsch S, Kollig E, Laumann S, et al. Respiratoric consequences of prone position in therapy of critically ill patients after major abdominal surgery [abstract]. *Intensive Care Med.* 1999;25:S73.
16. Kornecki A, Frndova H, Coates AL, et al. 4A randomized trial of prolonged prone positioning in children with acute respiratory failure. *Chest.* 2001;119:211-218.
17. Hering R, Wrigge H, Vorwerk R et al. The effects of prone positioning on intraabdominal pressure and cardiovascular and renal function in patients with acute lung injury. *Anesth Analg.* 2001;92:1226-1231.
18. Mentzelopoulos SD, Sigala JS, Roussos C, et al. Partitioning of work of breathing in mechanically ventilated COPD patients: effects of body position. *Intensive Care Med.* 2001;27:S267.
19. Hering R, Vorwerk R, Wrigge H et al. Prone positioning, systemic hemodynamics, hepatic indocyanine green kinetics, and gastric intramucosal energy balance in patients with acute lung injury. *Intensive Care Med.* 2002;28:53-58.
20. Kim MJ, Hwang HJ, Song HH. A randomized trial on the effects of body positions on lung function with acute respiratory failure patients. *Int J Nurs Stud.* 2002;39:549-555.
21. Mentzelopoulos SD, Zakyntinos SG, Roussos C, et al. Prone position improves lung mechanical behavior and enhances gas exchange efficiency in mechanically ventilated COPD patients [abstract]. *Am J Respir Crit Care Med.* 2003;167:A180.
22. Mentzelopoulos SD, Zakyntinos SG, Roussos C, et al. Prone position improves lung mechanical behavior and enhances gas exchange efficiency in mechanically ventilated chronic obstructive pulmonary disease patients. *Anesth Analg.* 2003;96:1756-1767.
23. Sawhney A, Kumar N, Sreenivas V, et al. Prone versus supine position in mechanically ventilated children: a pilot study. *Medical Science Monitor.* 2005;11:CR235-CR240.

*Studies determined to be non-randomized after author contact (n=3)*

24. Loh T-F, Chan ILY. Prone positioning in children with severe hypoxemic respiratory failure (SHRF) on high frequency oscillation ventilation (HFOV) [abstract]. *Crit Care Med.* 2000;28:A85.
25. Vlasenko AV, Ostapchenko DV, Zacks NO, et al. Effectiveness of the prone position in patients with ARDS on CMV [abstract]. *Intensive Care Med.* 2003;29:S79.
26. Vlasenko AV, Ostapchenko DV, Zacks NO, et al. Prone positioning in ventilated ARDS patients [Russian]. *Vestnik Intensivnoy Terapii.* 2003(3):3-8.

*Studies not confirmed to be randomized after author contact (n=2)*

27. Eremenko A, Egorov V, Levikov D. Prone position in the treatment of ARDS after major cardiovascular surgery [abstract]. *Intensive Care Med.* 2000;26:S241.
28. Eremenko AA, Egorov VM, Levikov DI. Results of the treatment of cardiac surgery patients with postoperative acute respiratory distress syndrome by prone-position pulmonary ventilation [Russian]. *Anesteziol Reanimatol.* 2000(5)42-45. (Note: This is the published paper corresponding to reference 27.)
29. Oral U, Aribogan A, Isik G, et al. Early prone position administration in aspiration pneumonia cases [abstract]. *Br J Anaesth.* 1995;74:118.

*Planned randomized controlled trial (n=1)*

30. Mentzelopoulos SD, Roussos C, Zakyntinos SG. Prone position in early and severe acute respiratory distress syndrome: a design for a definitive randomized controlled trial. *Anesth Analg* 2007;104:466-468.
