# Supplementary material
Source: PubMed Central journal article supplement (PMC2292779)

**Appendix 5:** Effect of mechanical ventilation in the prone v. supine position for acute hypoxemic respiratory failure on the daily ratio of partial pressure of oxygen to inspired fraction of oxygen. Values are recorded in the morning just before the next proning manoeuvre in the prone group and at the corresponding morning time in the control (supine) group. The ratio of means measures the oxygenation difference between groups remaining after proned patients were returned to the supine position. Day 1 for this measurement refers to the measurement taken the morning after the first proning session and applies only to proning session durations of less than 24 hours. Data from one trial (Beuret et al.) includes only patients with acute hypoxemic respiratory failure. Ratio of means is the mean value in the prone group divided by the mean value in the supine group. *I*<sup>2</sup> is the percentage of total variation across studies due to between-study heterogeneity rather than chance. Complete citations of included studies are available in Appendix 2 at [www.cmaj.ca/cgi/content/full/178/9/xxx/dc2](http://www.cmaj.ca/cgi/content/full/178/9/xxx/dc2). Note: CI, confidence interval.

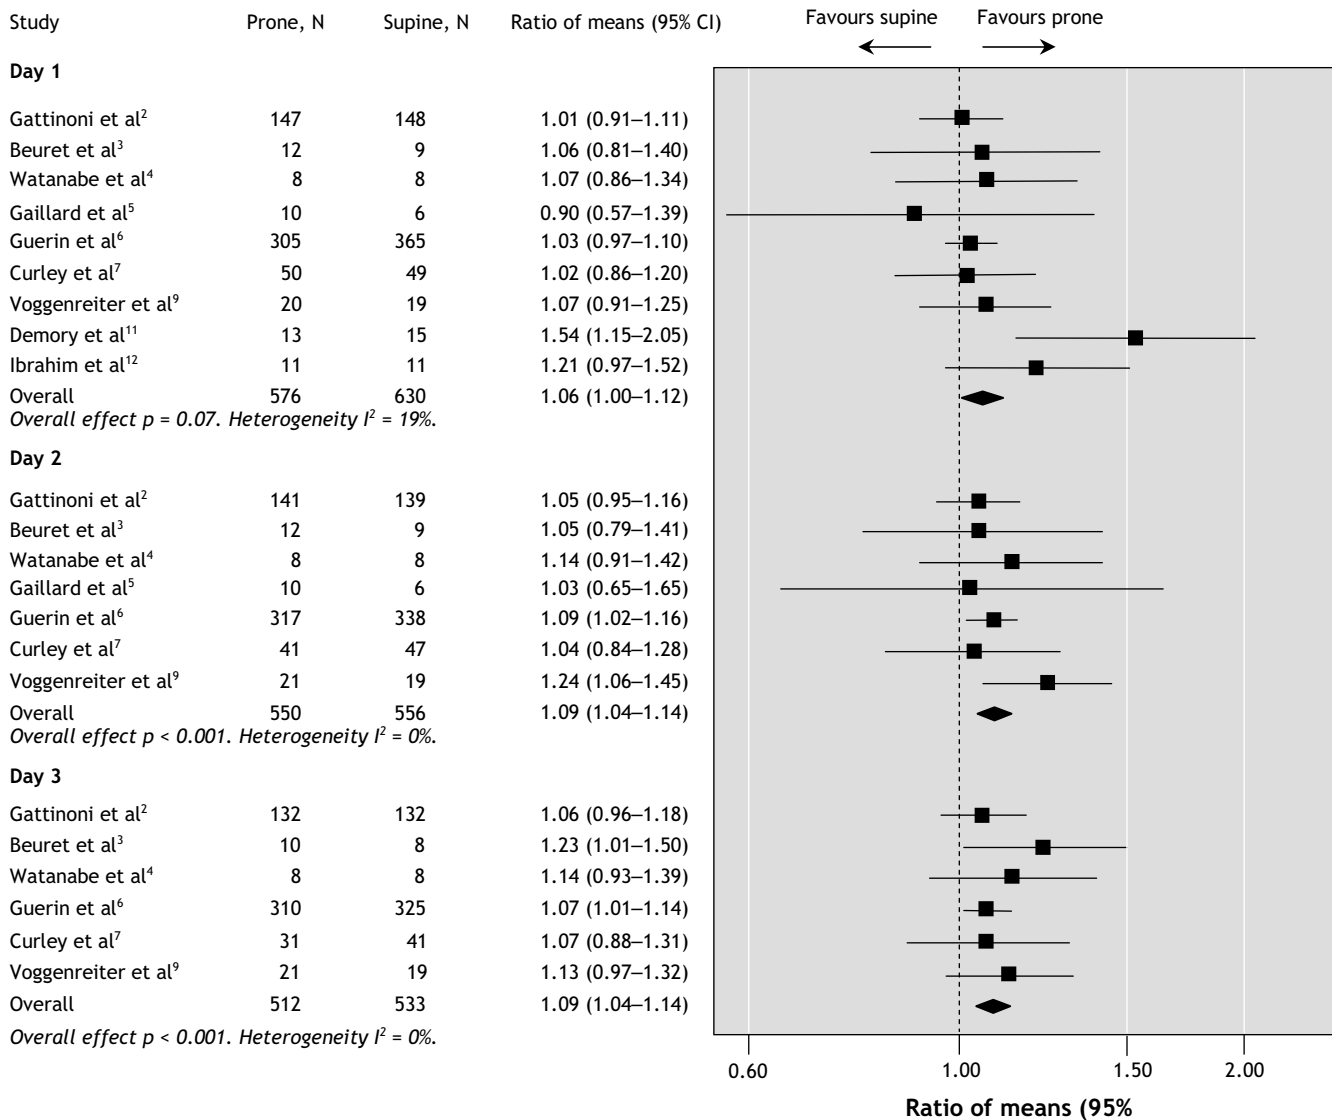

Supplement: cmaj_178_9_1153_v2_5.pdf [file cmaj_178_9_1153_v2_5.pdf]
